1 ***Ccdc38* is required for sperm flagellum biogenesis and male fertility in mouse**

2 Ruidan Zhang<sup>1,2#</sup>, Bingbing Wu<sup>1,2#</sup>, Chao Liu<sup>1,3</sup>, Xiuge Wang<sup>1,2</sup>, Liying Wang<sup>1,3</sup>, Sai

3 Xiao<sup>1,2</sup>, Yinghong Chen<sup>1,2</sup>, Huafang Wei<sup>1,3</sup>, Fei Gao<sup>1,2\*</sup>, Li Yuan<sup>4\*</sup>, Wei Li<sup>1,3\*</sup>

4 <sup>1</sup> State Key Laboratory of Stem Cell and Reproductive Biology, Institute of Zoology,  
5 Chinese Academy of Sciences, Beijing 100101, China

6 <sup>2</sup> University of the Chinese Academy of Sciences, Beijing 100049, China

7 <sup>3</sup> Guangzhou Women and Children's Medical Center, Guangzhou Medical University,  
8 510623 Guangzhou, China

9 <sup>4</sup> Savaid Medical School, University of Chinese Academy of Sciences, Beijing 100049,  
10 China

11 # These authors contributed equally to this work.

12 \*To whom correspondence should be addressed:

13 Dr. Wei Li

14 Institute of Zoology, Chinese Academy of Sciences

15 1-Beichen West Road, Chaoyang District,

16 Beijing, 100101, China

17 Tel: +86-10-64807529

18 E-mail: [leways@ioz.ac.cn](mailto:leways@ioz.ac.cn)

19 Dr. Li Yuan

20 Savaid Medical School,

21 University of Chinese Academy of Sciences

22 Tel: +86-10-88256717,

23 E-mail: [yuanli@ucas.ac.cn](mailto:yuanli@ucas.ac.cn)

24 Dr. Fei Gao

25 Institute of Zoology, Chinese Academy of Sciences

26 1-Beichen West Road, Chaoyang District,

27 Beijing, 100101, China

28 Tel: +86-10-64807593

29 E-mail: [gaof@ioz.ac.cn](mailto:gaof@ioz.ac.cn)

30 **Summary statement**

31 We demonstrated that CCDC38, localizes on manchette and sperm tail, is crucial

32 for male fertility.

33 **Abstract**

34 Sperm flagellum is essential for male fertility, defects in flagellum biogenesis are  
35 associated with male infertility. Deficiency of CCDC42 is associated with malformation  
36 of the mouse sperm flagella. Here, we find that the testis-specific expressed protein  
37 CCDC38 (coiled-coil domain containing 38) interacts with CCDC42 and localizes on  
38 manchette and sperm tail during spermiogenesis. Inactivation of CCDC38 in male mice  
39 results in distorted manchette, multiple morphological abnormalities of the flagella  
40 (MMAF) of spermatozoa, and eventually male sterility. Furthermore, we find that  
41 CCDC38 interacts with intra-flagellar transport protein 88 (IFT88) as well as the outer  
42 dense fibrous 2 (ODF2), and its depletion reduces the transportation of ODF2 to  
43 flagellum. Altogether, our results uncover the essential role of CCDC38 during sperm  
44 flagellum biogenesis, and suggesting the defects of these genes might be associated  
45 with male infertility in human being.

46 Keywords: MMAF; CCDC38; IFT88; ODF2; flagellum biogenesis

47

## 48 **Introduction**

49 Sperm flagellum is essential for sperm motility (Freitas et al., 2017, Pereira et al., 2017),  
50 which is a fundamental requirement for male fertility. The flagellum contains four parts:  
51 connecting piece, midpiece, principal piece and end piece. The core of sperm flagellum  
52 is the central axoneme, which consists of a central microtubule pair (CP) connected to  
53 9 peripheral outer microtubule doublets (MD) to form ‘9+2’ structure (Sironen et al.,  
54 2020). The axoneme possesses radial spokes that connect the central and peripheral  
55 microtubules and are related to the mechanical movement of the flagellum (Inaba,  
56 2011). Besides the axoneme, sperm flagellum contains unique structures, outer dense  
57 fiber (ODF) and fibrous sheath (FS) that are not present in cilia or unicellular flagella  
58 (Fawcett, 1975). The outer dense fibers (ODFs) are the main component cytoskeletal  
59 elements of sperm flagellum, which is required for the sperm motility (Inaba, 2011).  
60 ODFs contain 9 fibers in the midpiece, each of which is associated with a microtubule  
61 doublet. In the principal piece, ODFs 3 and 8 are replaced by two longitudinal columns  
62 of fibrous sheath (FS), in human, the diminished 3 and 8 fibers are finished at the  
63 annulus (Azizi and Ghafouri-Fard, 2017, Kim et al., 1999). There are at least 14  
64 polypeptides of ODFs such as ODF1, ODF2 (Lehti and Sironen, 2017). Any defects in  
65 the axoneme structure can cause abnormalities in the sperm flagellum, change its  
66 morphology, causing severe sperm motility disorders (Sha et al., 2014). Thus, axoneme  
67 structures are very important to sperm morphology and the function of flagellum.

68 Multiple morphological abnormalities of the flagella (MMAF) is a kind of severe  
69 teratozoospermia (Coutton et al., 2015), which is characterized by various spermatozoa  
70 phenotype with absent, short, coiled, irregular flagellum and others. There are many  
71 flagellar axoneme defects in MMAF patients, including disorganization of microtubule  
72 doublets (MD), outer dense fibrous (ODF), fibrous sheath (FS), outer or inner dynein  
73 arms (ODA, IDA) and others (Jiao et al., 2021). Over the past several years, many  
74 mutations have been found to be associated with MMAF patients, and a lot of mouse  
75 models display MMAF-like phenotype, *Dnah2* (Li et al., 2019), *Dnah8* (Liu et al.,  
76 2020), *Cfap44*, *Cfap65* (Tang et al., 2017, Li et al., 2020), *Qrich2* (Shen et al., 2019),

77 *Cep135* (Sha et al., 2017) and *Ttc21a* (Liu et al., 2019) are reported to MMAF related  
78 genes. Despite rapid progress in understanding the mechanism of MMAF, the  
79 pathogenesis of many idiopathic MMAF patients is still unknown.

80 The coiled-coil domain-containing (CCDC) proteins are involved in a variety of  
81 physiological and pathological processes. Increasing number of CCDC proteins have  
82 been suggested to be involved in ciliogenesis (Priyanka and Yenugu, 2021). But only  
83 some of those genes are involved in spermatogenesis, such as *Ccdc9*, *Ccdc11*, *Ccdc33*,  
84 *Ccdc42*, *Ccdc63*, *Ccdc172*, which are associated with sperm flagellum biogenesis and  
85 manchette formation, their defects lead to male infertility (Sha et al., 2019, Wu et al.,  
86 2021, Tapia Contreras and Hoyer-Fender, 2019, Young et al., 2015, Yamaguchi et al.,  
87 2014). *Ccdc42* is highly expressed in mouse testis, it localizes on manchette, HTCA  
88 and sperm tail during spermatogenesis, and it is necessary for HTCA assembly and  
89 sperm flagellum biogenesis (Tapia Contreras and Hoyer-Fender, 2019). However, the  
90 functional role of CCDC42 in spermatogenesis is still poorly understood.

91 Here, we found that CCDC38 was directly interacted with CCDC42, and it was  
92 expressed in the testis, and associated with the manchette in elongating spermatid.  
93 Importantly, *Ccdc38* knockout in mice resulted in abnormally elongated manchette and  
94 MMAF-like phenotype. Furthermore, we found that CCDC38 could interact with  
95 IFT88 and ODF2 to facilitate ODF2 transportation in flagella. Our results suggested  
96 that CCDC42 incorporating with CCDC38 mediates ODF2 transportation during  
97 flagellum biogenesis, and both are essential for flagellum biogenesis and male fertility  
98 in mice, suggesting some mutations of these two genes might be associated with male  
99 infertility in human being.

## 100 **Results**

### 101 **CCDC38 interacts with CCDC42**

102 Many CCDC proteins participate in flagellum biogenesis during spermiogenesis  
103 (Priyanka and Yenugu, 2021). CCDC42 localized to the centrosome, HTCA, manchette  
104 and sperm tail in male germ cells, and it is involved in the biogenesis of motile cilia  
105 and flagellum in mice (Perles et al., 2012, Tapia Contreras and Hoyer-Fender, 2019,

106 Pasek et al., 2016, Silva et al., 2016). To understand the underlying mechanism of  
107 CCDC42 in flagellum biogenesis during spermiogenesis, we used STRING database to  
108 search for CCDC42-binding candidates (Fig. 1A). CCDC38, reported as a testis-  
109 specific protein (Lin et al., 2016), was chosen first. Epitope-tagged CCDC42 and  
110 CCDC38 expressed in HEK293T cells followed by immunoprecipitation experiments  
111 demonstrated that CCDC38 was detected in anti-MYC immunoprecipitates from  
112 CCDC42 co-transfectants, but not from cells co-transfected with the control plasmid  
113 (Fig. 1B). An overlapping immunostaining pattern was clearly found in Hela cells  
114 transiently expressing GFP-CCDC38 and MYC-CCDC42, and GFP-CCDC38 could  
115 also co-localized with  $\gamma$ -TUBULIN as reported (Firat-Karalar et al., 2014) (Fig. 1C).  
116 These results suggest that CCDC42 indeed could interact with CCDC38.

117 Next, we examined the localization of the endogenous CCDC38 during  
118 spermatogenesis. CCDC38 was detected as two adjacent spots near the nuclei of  
119 spermatocytes or round spermatids, while it localized to the skirt-like structure  
120 encircling the spermatid head from step 9 to step 14 and the testicular sperm tail (Fig.  
121 1D). We therefore speculate that CCDC38 might participate in flagellum biogenesis  
122 during spermiogenesis.

### 123 ***Ccdc38* knockout leads to male infertility**

124 Reverse transcription-polymerase chain reaction (RT-PCR) revealed that *Ccdc38* was  
125 detected in the testis and firstly expressed at postnatal day 14 (P14), and peaked on P35  
126 (Fig. 2A, B). To determine the physiological role of CCDC38, we generated *Ccdc38*-  
127 deficient mice by applying the CRISPR-Cas9 system to delete Exon 5 to Exon 11 of  
128 the *Ccdc38* gene (Fig. 2C). The *Ccdc38* knockout mice were genotyped by genomic  
129 DNA sequencing and further confirmed by PCR with 591 bp in *Ccdc38*<sup>+/+</sup>, and 750 bp  
130 in *Ccdc38*<sup>-/-</sup> mice (Fig. 2D). Subsequent Western blotting analysis validated complete  
131 ablation of CCDC38 protein extracted from *Ccdc38*<sup>-/-</sup> testes (Fig. 2E). We then  
132 examined the fertility of *Ccdc38*<sup>-/-</sup> mice. Male *Ccdc38*<sup>-/-</sup> mice exhibited normal  
133 mounting behaviors and produced coital plugs, but failed to produce any offspring after  
134 mating with WT adult female mice, in contrast, female *Ccdc38*<sup>-/-</sup> mice generated

135 offspring after mating with WT adult males (Fig. 2F). Surprisingly, the knockout of  
136 *Ccdc38* did not affect either testis size (Fig 2G) or the ratio of testis weight and body  
137 weight (Fig. 2H, I, J). Taken together, *Ccdc38* knockout leads to male infertility.

### 138 ***Ccdc38* knockout results in MMAF**

139 To further explore the cause of the male infertility, we examined the cauda epididymis  
140 of *Ccdc38*<sup>+/+</sup> and *Ccdc38*<sup>-/-</sup> mice by Hematoxylin and Eosin (H&E) staining, and found  
141 there was fewer spermatozoa in the epididymal lumen of *Ccdc38*<sup>-/-</sup> mice compared with  
142 *Ccdc38*<sup>+/+</sup> mice (Fig. 3A). We then released the spermatozoa from epididymis, and  
143 found that the sperm number of *Ccdc38*<sup>-/-</sup> mice was significantly less than that of  
144 *Ccdc38*<sup>+/+</sup> mice (Fig. 3B), especially the motile spermatozoa decreased sharply (Fig.  
145 3C). We further noticed *Ccdc38*<sup>-/-</sup> spermatozoa bearing morphological aberrations,  
146 including abnormal nuclei and MMAF-like phenotype of short tail, curly tail, tailless  
147 (Fig. 3D). The ratio of spermatozoa with abnormal heads and flagella was shown in Fig.  
148 3E. Scanning electron microscopy (SEM) detailed the morphological abnormalities of  
149 *Ccdc38*<sup>-/-</sup> spermatozoa as follows (Fig. 3F): short tail (Type 1); disordered filaments  
150 (Type 2); impaired spermatozoa head (Type 4); curly tail (Type 5). Therefore, the  
151 knockout of *Ccdc38* results in MMAF-like phenotype in mice.

### 152 **Spermiogenesis is defected in *Ccdc38*<sup>-/-</sup> mice**

153 To further investigate why *Ccdc38* knockout leads to MMAF-like phenotype, we first  
154 used Periodic Acid Schiff (PAS) staining to determine at which stage the defect  
155 occurred. In *Ccdc38*<sup>+/+</sup> mice testis section, round spermatid differentiated into  
156 elongating spermatids at stage IX, while there still were round spermatid and mature  
157 sperm at stage IX in *Ccdc38*<sup>-/-</sup> mice testis (Fig. 4A). In order to delineate the detail  
158 defects of *Ccdc38*<sup>-/-</sup> spermatids, we analyzed step 1-16 spermatids of both *Ccdc38*<sup>+/+</sup>  
159 and *Ccdc38*<sup>-/-</sup> mice, and found that in steps 1-8, the morphology of acrosome and  
160 nucleus of *Ccdc38*<sup>-/-</sup> spermatids were similarly to that of the WT. In *Ccdc38*<sup>+/+</sup> mice,  
161 spermatid head began elongation and mature from step 9, while in *Ccdc38*<sup>-/-</sup> mice,  
162 spermatid head were abnormally elongated in step 9, eventually formed abnormal  
163 sperm at step16 (Fig. 4B). These results mean CCDC38 plays essential role during

164 spermiogenesis.

165 **Flagellum is disorganized and Manchette is ectopically placed in *Ccdc38*<sup>-/-</sup>**  
166 **spermatids**

167 To study the causes of abnormal sperm morphology after *Ccdc38* depletion, H&E  
168 staining was used to detect the morphology of seminiferous tubules between *Ccdc38*<sup>+/+</sup>  
169 and *Ccdc38*<sup>-/-</sup> mice. Compared with *Ccdc38*<sup>+/+</sup> testis, obvious shortened tail and tailless  
170 sperm could be detected in *Ccdc38*<sup>-/-</sup> testis (Fig. 5A). Immunofluorescence staining for  
171 acetylated TUBULIN, the specific flagellum marker, further confirmed the flagellum  
172 biogenesis defects in *Ccdc38*<sup>-/-</sup> testis (Fig. 5B). We conducted immunofluorescence  
173 analysis of both PNA and  $\alpha/\beta$  TUBULIN to determine which stages were affected by  
174 *Ccdc38* knockout, and found that the flagella of *Ccdc38*<sup>-/-</sup> spermatids were shorter and  
175 curly from stage IV-V than that of *Ccdc38*<sup>+/+</sup> spermatids (Fig. 5C). By using  
176 transmission electron microscopy (TEM), we observed that the Outer Dense Fibrous  
177 (ODF), Fibrous Sheath (FS) and mitochondria sheath were also abnormally organized  
178 in the *Ccdc38* KO elongating spermatids (Fig. 5D).

179 When spermatids were elongated, the sperm head was abnormal, indicating that  
180 the manchette might be abnormally formed (Fig. 5C). Manchette is important for sperm  
181 head shaping (Wei and Yang, 2018). So, we scrutinized manchette structure, and found  
182 the manchette of *Ccdc38*<sup>-/-</sup> spermatids were roughly normal at steps 8-10, but from steps  
183 11-12, they displayed abnormally longer than that of the control mice (Fig. 6A). We  
184 also used TEM to detect the manchette, *Ccdc38* knockout spermatids became  
185 abnormally elongated from step 11 but not in the control spermatids (Fig. 6B). In  
186 support of these result, we found that CCDC38 co-localized with  $\alpha$ -TUBULIN at  
187 manchette in the control mice (Fig. 6C). All these results suggest that CCDC38 should  
188 be involved in flagellum biogenesis.

189 **CCDC38 interacts with IFT88**

190 It has been reported that CCDC42, IFT88 and KIF3A are involved in the anterograde  
191 transportation during flagellum biogenesis (Wu et al., 2021). To test whether CCDC38  
192 also participates in anterograde transportation by interacting with IFT complexes, such



193 as IFT88 and IFT20, we co-transfected pCSII-MYC-IFT88 or pRK-FLAG-IFT20 with  
194 pEGFP-C1-CCDC38 to the HEK293T cells, then immunoprecipitated CCDC38 with  
195 anti-GFP antibody, and found that IFT88 could be immunoprecipitated by CCDC38  
196 (Fig. 7A), but not IFT20 (Fig. 7B). We also detected their expression level in *Ccdc38*<sup>+/+</sup>  
197 and *Ccdc38*<sup>-/-</sup> mice testis, and found IFT88 and IFT20 expression were all obviously  
198 decreased in *Ccdc38*<sup>-/-</sup> mice testis (Fig. 7C, D). Then we detected the distribution of  
199 IFT88 in spermatids at different steps, and found that IFT88 was presented in the  
200 manchette and elongating sperm tails in *Ccdc38*<sup>+/+</sup> mice, while in the *Ccdc38*<sup>-/-</sup>  
201 spermatids, IFT88 still trapped close to the nucleus with a puncta-like structure (Fig.  
202 7E). Therefore, CCDC38 might regulate sperm flagellum biogenesis by interacting with  
203 IFT B complexes.

#### 204 **ODF transportation is defected in *Ccdc38* knockout spermatids**

205 It has been reported that ODF1 and ODF2 could interact with CCDC42, and they are  
206 found to be involved in the formation of male germ cell cytoskeleton (Tapia Contreras  
207 and Hoyer-Fender, 2019). To study the relationship between CCDC38 and ODF2,  
208 reciprocal coimmunoprecipitation assays were carried out. we transfected pCDNA-  
209 HA-ODF2 plasmid and pEGFP-C1-CCDC38 plasmid in to HEK293T cells, CCDC38  
210 and ODF2 were able to interact with the other in reciprocal immunoprecipitation  
211 experiments (Fig. 8A), suggesting CCDC38 might interact with ODF2.

212 As the main cytoskeleton protein in the ODFs, ODF2 is essential for sperm  
213 flagellum integrity and beating (Donkor et al., 2004, Ito et al., 2019, Fawcett, 1975).  
214 We examined the effect of *Ccdc38* knockout on ODF1 and ODF2 protein levels, and  
215 found that ODF2, but not ODF1, was significantly decreased in *Ccdc38*<sup>-/-</sup> testicular  
216 extracts (Fig. 8B, C). Then, we used immunofluorescence to detect the expression of  
217 ODF2 in spermatids and epididymal spermatozoa. We found that ODF2 localized on  
218 manchette along with the sperm tail in elongated spermatids of *Ccdc38*<sup>+/+</sup> mice,  
219 whereas ODF2 was detected on manchette without tail staining in most of elongated  
220 spermatids (Fig. 8D). Of note, ODF2 co-localized with  $\alpha$ -TUBULIN on the midpiece  
221 and principal piece of *Ccdc38*<sup>+/+</sup> sperm tail, while ODF2 signal displayed discontinuous,



222 punctiform short or curly on *Ccdc38* knockout spermatozoa (Fig. 8E), suggesting that  
223 the defects of ODFs in *Ccdc38* knockout spermatozoa might come from a defect of  
224 ODF2 transportation during spermiogenesis.

## 225 **Discussion**

226 *Ccdc38* is a testis specific expression gene (Lin et al., 2016), but its role during  
227 spermiogenesis has not been investigated yet. In order to study its role during  
228 spermiogenesis, we generated *Ccdc38*<sup>-/-</sup> mouse model. *Ccdc38*<sup>-/-</sup> male mice was sterile  
229 (Fig. 2F) due to significantly reduced spermatozoa number and motility (Fig. 3B, C),  
230 albeit with no significant size difference between *Ccdc38*<sup>+/+</sup> and *Ccdc38*<sup>-/-</sup> testes (Fig.  
231 2G).

232 The manchette is a transient structure in developing germ cells, which is required  
233 for sperm nuclear condensation and flagellum biogenesis (Wei and Yang, 2018). It  
234 provides the structural basis for intra-manchette transport (IMT), IMT transfers  
235 structural and functional proteins to the basal body and is essential for nucleo-  
236 cytoplasmic transport (Kierszenbaum, 2002, Kierszenbaum et al., 2002). As an IMT  
237 component, CCDC42 localizes to the manchette, connecting piece and sperm tail during  
238 spermiogenesis, and it can interact with ODF1, ODF2 to regulate germ cell  
239 cytoskeleton formation (Tapia Contreras and Hoyer-Fender, 2019, Pasek et al., 2016).  
240 Here, we found that CCDC38 could interact with CCDC42, and co-localized with  
241 CCDC42 on centrosome in Hela cells (Fig. 1A, B, C). In addition, CCDC38 were found  
242 to localize on manchette and sperm tail (Fig. 1D), and it interacted with ODF2 (Fig.  
243 8A). ODF2 is a component of outer dense fibers, and it is important for sperm flagellum  
244 assembly, the knockout of this gene leads to preimplantation lethal, and even the  
245 absence of a single copy of this gene results in sperm neck-midpiece separation (Qian  
246 et al., 2016, Tarnasky et al., 2010). Here, we found that once *Ccdc38* was knocked out,  
247 the protein level of ODF2 was decreased in testis (Fig. 8B, C) and its distribution was  
248 disturbed in flagella (Fig. 8D, E). Thus, CCDC38 either works as a partner of ODF2 to  
249 keep its stability or participates in IMT to intermediate ODF2 transportation during  
250 flagellum biogenesis. Since CCDC38 also interacted with CCDC42, we prefer the

251 second one, and this possibility is also supported by its interaction with IFT88.

252 In addition to IMT, the intra-flagellar transport (IFT) is also required for flagellum  
253 biogenesis. IFT is responsible for sperm-protein transportation during the development  
254 of the flagella. During IFT, cargoes are transported from the basal body to the tips of  
255 the flagellum and then back to the sperm head along the axoneme (Scholey, 2003,  
256 Taschner and Lorentzen, 2016, Ishikawa and Marshall, 2017). IFT88 is an IFT B  
257 components, it presents in the heads and tails only in step 15, and no longer being  
258 detected in mature sperm (San Agustin et al., 2015), it can interact with kinesin to  
259 regulate the anterograde transport along axoneme (Rosenbaum and Witman, 2002).  
260 Worked as an IFT88 interacting protein (Fig. 7A), CCDC38 may also participate in the  
261 anterograde transport along the flagellum. Thus, CCDC38 may interact with both  
262 CCDC42 and IFT88 to regulate cargoes transportation by IMT and IFT during  
263 flagellum biogenesis.

264 In summary, we identified a new CCDC42 interacting protein, CCDC38, which is  
265 essential for spermiogenesis and flagellum biogenesis, the knockout of this gene results  
266 in MMAF-like phenotype in mice. Since these genes are evolutionary conserved in  
267 human beings, we believe that some mutations of these genes should be existed in  
268 MMAF patients, albeit we do not find them right now.

## 269 **Materials and methods**

### 270 **Animals**

271 The mice *Ccdc38* gene is 1692 bp and contains 16 exons. The knockout mice of *Ccdc38*  
272 were generated by CRISPER-Cas9 system from Cyagen Biosciences. The genotyping  
273 primers for knockout were as follows: F1: GTAGCTGTTTCTAAGCGATCATCA,  
274 R1: ACTAGGTACCTCAAGCTGGTTTAGA, and for WT mice, the specific primers  
275 were: F1: GTAGCTGTTTCTAAGCGATCATCA,  
276 R2: GTCATGGGACAGATGTGGA ACTA.

277 All the animal experiments were performed according to approved institutional  
278 animal care and use committee (IACUC) protocols (# 08-133) of the Institute of  
279 Zoology, Chinese Academy of Sciences.

## 280 **Antibodies**

281 Mouse anti-GFP antibody (1:1000, M20004L, Abmart), rabbit anti-MYC antibody  
282 (1:1000, BE2011, Abmart), ODF2 antibody (12058-1-AP, Proteintech) was used at a  
283 dilution at 1:1000 for western blotting and 1: 200 for immunofluorescence. Mouse anti-  
284  $\alpha$ -TUBULIN antibody (1:200, AC012, Abclonal) for immunofluorescence. Mouse anti-  
285 GAPDH antibody (1:10000, AC002, Abclonal) for western blotting. Mouse anti-ODF1  
286 antibody (1:500, sc-390152, santa) for western blotting. Mouse anti-CCDC38 were  
287 generated from Dia-an Biotech (Wuhan, China). The Alexa Fluor 488 conjugate of  
288 lectin PNA (1:400, L21409, Thermo Fisher), the Mito-Tracker Deep Red 633 (1:1000,  
289 M22426, Thermo Fisher) were used for immunofluorescence. The secondary  
290 antibodies were goat anti rabbit FITC (1:200, ZF-0311, Zhong Shan Jin Qiao), goat anti  
291 TRITC (1:200, ZF-0316, Zhong Shan Jin Qiao), goat anti mouse FITC (1:200, ZF-0312,  
292 Zhong Shan Jin Qiao), goat anti rabbit TRITC (1:200, ZF0313, Zhong Shan Jin Qiao).

## 293 **Immunoblotting**

294 As previously reported (Liu et al., 2016), testis albuginea was peeled and added in RIPA  
295 buffer supplemented with 1mM phenyl methyl sulfonyl fluoride (PMSF) and PIC  
296 (Roche Diagnostics, 04693132001), the solution was sonicated transiently and then on  
297 the ice for 30 min. The samples were centrifuged at 12000 rpm for 15 min at 4°C. Then,  
298 the supernatant was collected at a new tube. The protein lysates were electrophoresed  
299 and electrotransferred, then incubated with primary antibody and second antibody, next  
300 the membrane was scanned via an Odyssey infrared imager (LI-COR Biosciences,  
301 Lincoln, NE, RRID:SCR\_014579).

## 302 **Immunoprecipitation**

303 Transfected cells were lysed in a lysis buffer (50mM HEPES, PH 7.4, 250mM NaCl,  
304 0.1% NP-40 containing PIC and PMSF) on ice for 30 min, and centrifugated at 12000  
305 rpm at 4°C for 15 min, cell lysates were incubated with primary antibody overnight at  
306 4°C, next incubated with protein A for 2h at 4°C, then washed 3 times with lysed buffer  
307 and subjected to immunoblotting analysis.

## 308 **Epididymal sperm count**

309 The cauda epididymis was isolated from 8 weeks mice. Sperm was released from the  
310 cauda epididymis with HTF and incubated at 37°C for 15 min. Then the medium was  
311 diluted at 1:100 and counted the sperm number with hemocytometer.

### 312 **Tissue collection and histological analysis**

313 As previously reported (Wang et al., 2018), the testes were dissected after euthanasia,  
314 and fixed with Bouin's fixative for 24h at 4 °C, then the testes were dehydrated with  
315 graded ethanol and embedded in paraffin. The 5um sections were cutted and covered  
316 on glass slides. Sections were stained with H&E and PAS for histological analysis after  
317 deparaffinization.

### 318 **Transmission electron microscopy**

319 The methods were as reported previously with some modifications (Liu et al., 2016).  
320 The testis from WT and *Ccdc38* depletion mice testis and epididymis were dissected  
321 and fixed in 2.5% glutaraldehyde in 0.1 M cacodylate buffer at 4°C overnight. After  
322 washing in 0.1 M cacodylate buffer, samples were cutted into small pieces, then  
323 immersed in 1% OsO<sub>4</sub> for 1h at 4°C. Samples were dehydrated through a graded  
324 acetone series and embedded in resin for staining. Ultrathin sections were cutted and  
325 stained with uranyl acetate and lead citrate, images were acquired and analyzed using  
326 a JEM-1400 transmission electron microscope.

### 327 **Scanning electron microscopy**

328 The sperm were released from epididymis in HTF at 37°C 15 min, centrifugated 5 min  
329 at 500 g, then washed twice with PB, and fixed in 2.5% glutaraldehyde solution  
330 overnight, and dehydrated in a graded ethanol, subjected to drying and coated with gold.  
331 The images were acquired and analyzed using SU8010 scanning electron microscope.

### 332 **Immunofluorescence**

333 The testis albuginea was peeled and incubated with collagenase IV and hyaluronidase  
334 in PBS for 15 min at 37°C, then washed twice with PBS. Next, fixed with 4% PFA 5  
335 min, and then coated on slide glass to dry out. The slides were washed with PBS three  
336 times and then treated with 0.5% TritonX-100 for 5 min, and blocked with 5% BSA for  
337 30 min. Added the primary antibodies and incubated at 4°C overnight, followed by

338 incubating with second antibody and DAPI. The images were taken using a LSM880  
339 and Sp8 microscopes.

#### 340 **Statistical Analysis**

341 All data are presented as the mean  $\pm$  SEM. The statistical significance of the differences  
342 between the mean values for the various genotypes was measured by Student's t-tests  
343 with paired, 2-tailed distribution. The data were considered significant when the P-  
344 value was less than 0.05(\*), 0.01(\*\*) or 0.001(\*\*\*)).

#### 345 **Acknowledgements**

346 This work was funded by the National Natural Science Foundation of China (grants  
347 91649202), the Strategic Priority Research Program of the Chinese Academy of  
348 Sciences (grant XDA16020701), and the National Key R&D Program of China (grant  
349 2016YFA0500901).

#### 350 **Authors Contributions**

351 RDZ and BBW performed most of the experiments and wrote the manuscript. CL,  
352 XGW, LYW, XS and YHC performed part of the experiment. WL supervised the whole  
353 project and revised the manuscript.

#### 354 **Compliance with ethical standards**

355 All animal experiments were performed according to approved institutional animal care  
356 and use committee (IACUC) protocols (#08-133) of the Institute of Zoology, Chinese  
357 Academy of Sciences. All surgery was performed under sodium pentobarbital  
358 anesthesia, and every effort was made to minimize suffering.

#### 359 **Conflict of interest**

360 The authors declare that they have no conflict of interest.

361

#### 362 **References**

- 363 AZIZI, F. & GHAFOURI-FARD, S. 2017. Outer Dense Fiber Proteins: Bridging  
364 between Male Infertility and Cancer. *Arch Iran Med*, 20, 320-325.
- 365 COUTTON, C., ESCOFFIER, J., MARTINEZ, G., ARNOULT, C. & RAY, P. F. 2015.  
366 Teratozoospermia: spotlight on the main genetic actors in the human. *Hum*  
367 *Reprod Update*, 21, 455-85.
- 368 DONKOR, F. F., MONNICH, M., CZIRR, E., HOLLEMANN, T. & HOYER-  
369 FENDER, S. 2004. Outer dense fibre protein 2 (ODF2) is a self-interacting  
370 centrosomal protein with affinity for microtubules. *J Cell Sci*, 117, 4643-51.

- 371 FAWCETT, D. W. 1975. The mammalian spermatozoon. *Dev Biol*, 44, 394-436.
- 372 FIRAT-KARALAR, E. N., SANTE, J., ELLIOTT, S. & STEARNS, T. 2014. Proteomic  
373 analysis of mammalian sperm cells identifies new components of the  
374 centrosome. *J Cell Sci*, 127, 4128-33.
- 375 FREITAS, M. J., VIJAYARAGHAVAN, S. & FARDILHA, M. 2017. Signaling  
376 mechanisms in mammalian sperm motility. *Biol Reprod*, 96, 2-12.
- 377 INABA, K. 2011. Sperm flagella: comparative and phylogenetic perspectives of protein  
378 components. *Mol Hum Reprod*, 17, 524-38.
- 379 ISHIKAWA, H. & MARSHALL, W. F. 2017. Intraflagellar Transport and Ciliary  
380 Dynamics. *Cold Spring Harb Perspect Biol*, 9.
- 381 ITO, C., AKUTSU, H., YAO, R., YOSHIDA, K., YAMATOYA, K., MUTOH, T.,  
382 MAKINO, T., AOYAMA, K., ISHIKAWA, H., KUNIMOTO, K., TSUKITA, S.,  
383 NODA, T., KIKKAWA, M. & TOSHIMORI, K. 2019. Odf2 haploinsufficiency  
384 causes a new type of decapitated and decaudated spermatozoa, Odf2-DDS, in  
385 mice. *Sci Rep*, 9, 14249.
- 386 JIAO, S. Y., YANG, Y. H. & CHEN, S. R. 2021. Molecular genetics of infertility: loss-  
387 of-function mutations in humans and corresponding knockout/mutated mice.  
388 *Hum Reprod Update*, 27, 154-189.
- 389 KIERSZENBAUM, A. L. 2002. Intramanchette transport (IMT): managing the making  
390 of the spermatid head, centrosome, and tail. *Mol Reprod Dev*, 63, 1-4.
- 391 KIERSZENBAUM, A. L., GIL, M., RIVKIN, E. & TRES, L. L. 2002. Ran, a GTP-  
392 binding protein involved in nucleocytoplasmic transport and microtubule  
393 nucleation, relocates from the manchette to the centrosome region during rat  
394 spermiogenesis. *Mol Reprod Dev*, 63, 131-40.
- 395 KIM, Y. H., MCFARLANE, J. R., O'BRYAN, M. K., ALMAHBOBI, G., TEMPLE-  
396 SMITH, P. D. & DE KRETSEK, D. M. 1999. Isolation and characterization of  
397 rat sperm tail outer dense fibres and comparison with rabbit and human  
398 spermatozoa using a polyclonal antiserum. *J Reprod Fertil*, 116, 345-53.
- 399 LEHTI, M. S. & SIRONEN, A. 2017. Formation and function of sperm tail structures  
400 in association with sperm motility defects. *Biol Reprod*, 97, 522-536.
- 401 LI, L., FENG, F., WANG, Y., GUO, J. & YUE, W. 2020. Mutational effect of human  
402 CFAP43 splice-site variant causing multiple morphological abnormalities of the  
403 sperm flagella. *Andrologia*, 52, e13575.
- 404 LI, Y., SHA, Y., WANG, X., DING, L., LIU, W., JI, Z., MEI, L., HUANG, X., LIN, S.,  
405 KONG, S., LU, J., QIN, W., ZHANG, X., ZHUANG, J., TANG, Y. & LU, Z.  
406 2019. DNAH2 is a novel candidate gene associated with multiple  
407 morphological abnormalities of the sperm flagella. *Clin Genet*, 95, 590-600.
- 408 LIN, S. R., LI, Y. C., LUO, M. L., GUO, H., WANG, T. T., CHEN, J. B., MA, Q., GU,  
409 Y. L., JIANG, Z. M. & GUI, Y. T. 2016. Identification and characteristics of the  
410 testes-specific gene, *Ccdc38*, in mice. *Mol Med Rep*, 14, 1290-6.
- 411 LIU, C., MIYATA, H., GAO, Y., SHA, Y., TANG, S., XU, Z., WHITFIELD, M.,  
412 PATRAT, C., WU, H., DULIOUST, E., TIAN, S., SHIMADA, K., CONG, J.,  
413 NODA, T., LI, H., MOROHOSHI, A., CAZIN, C., KHERRAF, Z. E.,  
414 ARNOULT, C., JIN, L., HE, X., RAY, P. F., CAO, Y., TOURE, A., ZHANG, F.



- 415 & IKAWA, M. 2020. Bi-allelic DNAH8 Variants Lead to Multiple  
416 Morphological Abnormalities of the Sperm Flagella and Primary Male  
417 Infertility. *Am J Hum Genet*, 107, 330-341.
- 418 LIU, C., WANG, H., SHANG, Y., LIU, W., SONG, Z., ZHAO, H., WANG, L., JIA, P.,  
419 GAO, F., XU, Z., YANG, L., GAO, F. & LI, W. 2016. Autophagy is required for  
420 ectoplasmic specialization assembly in sertoli cells. *Autophagy*, 12, 814-32.
- 421 LIU, W., HE, X., YANG, S., ZOUARI, R., WANG, J., WU, H., KHERRAF, Z. E., LIU,  
422 C., COUTTON, C., ZHAO, R., TANG, D., TANG, S., LV, M., FANG, Y., LI,  
423 W., LI, H., ZHAO, J., WANG, X., ZHAO, S., ZHANG, J., ARNOULT, C., JIN,  
424 L., ZHANG, Z., RAY, P. F., CAO, Y. & ZHANG, F. 2019. Bi-allelic Mutations  
425 in TTC21A Induce Asthenoteratospermia in Humans and Mice. *Am J Hum*  
426 *Genet*, 104, 738-748.
- 427 PASEK, R. C., MALARKEY, E., BERBARI, N. F., SHARMA, N., KESTERSON, R.  
428 A., TRES, L. L., KIERSZENBAUM, A. L. & YODER, B. K. 2016. Coiled-coil  
429 domain containing 42 (Ccdc42) is necessary for proper sperm development and  
430 male fertility in the mouse. *Dev Biol*, 412, 208-18.
- 431 PEREIRA, R., SA, R., BARROS, A. & SOUSA, M. 2017. Major regulatory  
432 mechanisms involved in sperm motility. *Asian J Androl*, 19, 5-14.
- 433 PERLES, Z., CINNAMON, Y., TA-SHMA, A., SHAAG, A., EINBINDER, T., REIN,  
434 A. J. & ELPELEG, O. 2012. A human laterality disorder associated with  
435 recessive CCDC11 mutation. *J Med Genet*, 49, 386-90.
- 436 PRIYANKA, P. P. & YENUGU, S. 2021. Coiled-Coil Domain-Containing (CCDC)  
437 Proteins: Functional Roles in General and Male Reproductive Physiology.  
438 *Reprod Sci*.
- 439 QIAN, X., WANG, L., ZHENG, B., SHI, Z. M., GE, X., JIANG, C. F., QIAN, Y. C.,  
440 LI, D. M., LI, W., LIU, X., YIN, Y., ZHENG, J. T., SHEN, H., WANG, M.,  
441 GUO, X. J., HE, J., LIN, M., LIU, L. Z., SHA, J. H. & JIANG, B. H. 2016.  
442 Deficiency of Mkrn2 causes abnormal spermiogenesis and spermiation, and  
443 impairs male fertility. *Sci Rep*, 6, 39318.
- 444 ROSENBAUM, J. L. & WITMAN, G. B. 2002. Intraflagellar transport. *Nat Rev Mol*  
445 *Cell Biol*, 3, 813-25.
- 446 SAN AGUSTIN, J. T., PAZOUR, G. J. & WITMAN, G. B. 2015. Intraflagellar  
447 transport is essential for mammalian spermiogenesis but is absent in mature  
448 sperm. *Mol Biol Cell*, 26, 4358-72.
- 449 SCHOLEY, J. M. 2003. Intraflagellar transport. *Annu Rev Cell Dev Biol*, 19, 423-43.
- 450 SHA, Y.-W., XU, X., MEI, L.-B., LI, P., SU, Z.-Y., HE, X.-Q. & LI, L. 2017. A  
451 homozygous CEP135 mutation is associated with multiple morphological  
452 abnormalities of the sperm flagella (MMAF). *Gene*, 633, 48-53.
- 453 SHA, Y., XU, Y., WEI, X., LIU, W., MEI, L., LIN, S., JI, Z., WANG, X., SU, Z., QIU,  
454 P., CHEN, J. & WANG, X. 2019. CCDC9 is identified as a novel candidate gene  
455 of severe asthenozoospermia. *Syst Biol Reprod Med*, 65, 465-473.
- 456 SHA, Y. W., DING, L. & LI, P. 2014. Management of primary ciliary  
457 dyskinesia/Kartagener's syndrome in infertile male patients and current  
458 progress in defining the underlying genetic mechanism. *Asian J Androl*, 16, 101-



- 459 6.
- 460 SHEN, Y., ZHANG, F., LI, F., JIANG, X., YANG, Y., LI, X., LI, W., WANG, X.,  
461 CHENG, J., LIU, M., ZHANG, X., YUAN, G., PEI, X., CAI, K., HU, F., SUN,  
462 J., YAN, L., TANG, L., JIANG, C., TU, W., XU, J., WU, H., KONG, W., LI, S.,  
463 WANG, K., SHENG, K., ZHAO, X., YUE, H., YANG, X. & XU, W. 2019.  
464 Loss-of-function mutations in QRICH2 cause male infertility with multiple  
465 morphological abnormalities of the sperm flagella. *Nat Commun*, 10, 433.
- 466 SILVA, E., BETLEJA, E., JOHN, E., SPEAR, P., MORESCO, J. J., ZHANG, S.,  
467 YATES, J. R., 3RD, MITCHELL, B. J. & MAHJOUB, M. R. 2016. Ccdc11 is  
468 a novel centriolar satellite protein essential for ciliogenesis and establishment  
469 of left-right asymmetry. *Mol Biol Cell*, 27, 48-63.
- 470 SIRONEN, A., SHOEMARK, A., PATEL, M., LOEBINGER, M. R. & MITCHISON,  
471 H. M. 2020. Sperm defects in primary ciliary dyskinesia and related causes of  
472 male infertility. *Cell Mol Life Sci*, 77, 2029-2048.
- 473 TANG, S., WANG, X., LI, W., YANG, X., LI, Z., LIU, W., LI, C., ZHU, Z., WANG, L.,  
474 WANG, J., ZHANG, L., SUN, X., ZHI, E., WANG, H., LI, H., JIN, L., LUO,  
475 Y., WANG, J., YANG, S. & ZHANG, F. 2017. Biallelic Mutations in CFAP43  
476 and CFAP44 Cause Male Infertility with Multiple Morphological Abnormalities  
477 of the Sperm Flagella. *Am J Hum Genet*, 100, 854-864.
- 478 TAPIA CONTRERAS, C. & HOYER-FENDER, S. 2019. CCDC42 Localizes to  
479 Manchette, HTCA and Tail and Interacts With ODF1 and ODF2 in the  
480 Formation of the Male Germ Cell Cytoskeleton. *Front Cell Dev Biol*, 7, 151.
- 481 TARNASKY, H., CHENG, M., OU, Y., THUNDATHIL, J. C., OKO, R. & VAN DER  
482 HOORN, F. A. 2010. Gene trap mutation of murine outer dense fiber protein-2  
483 gene can result in sperm tail abnormalities in mice with high percentage  
484 chimaerism. *BMC Dev Biol*, 10, 67.
- 485 TASCHNER, M. & LORENTZEN, E. 2016. The Intraflagellar Transport Machinery.  
486 *Cold Spring Harb Perspect Biol*, 8.
- 487 WANG, L., TU, Z., LIU, C., LIU, H., KALDIS, P., CHEN, Z. & LI, W. 2018. Dual  
488 roles of TRF1 in tethering telomeres to the nuclear envelope and protecting  
489 them from fusion during meiosis. *Cell Death Differ*, 25, 1174-1188.
- 490 WEI, Y. L. & YANG, W. X. 2018. The acroframosome-acroplaxome-manchette axis  
491 may function in sperm head shaping and male fertility. *Gene*, 660, 28-40.
- 492 WU, B., YU, X., LIU, C., WANG, L., HUANG, T., LU, G., CHEN, Z. J., LI, W. & LIU,  
493 H. 2021. Essential Role of CFAP53 in Sperm Flagellum Biogenesis. *Front Cell  
494 Dev Biol*, 9, 676910.
- 495 YAMAGUCHI, A., KANEKO, T., INAI, T. & IIDA, H. 2014. Molecular cloning and  
496 subcellular localization of Tektin2-binding protein 1 (Ccdc 172) in rat  
497 spermatozoa. *J Histochem Cytochem*, 62, 286-97.
- 498 YOUNG, S. A., MIYATA, H., SATOUH, Y., KATO, H., NOZAWA, K., ISOTANI, A.,  
499 AITKEN, R. J., BAKER, M. A. & IKAWA, M. 2015. CRISPR/Cas9-Mediated  
500 Rapid Generation of Multiple Mouse Lines Identified Ccdc63 as Essential for  
501 Spermogenesis. *Int J Mol Sci*, 16, 24732-50.

502

503 **Figures**

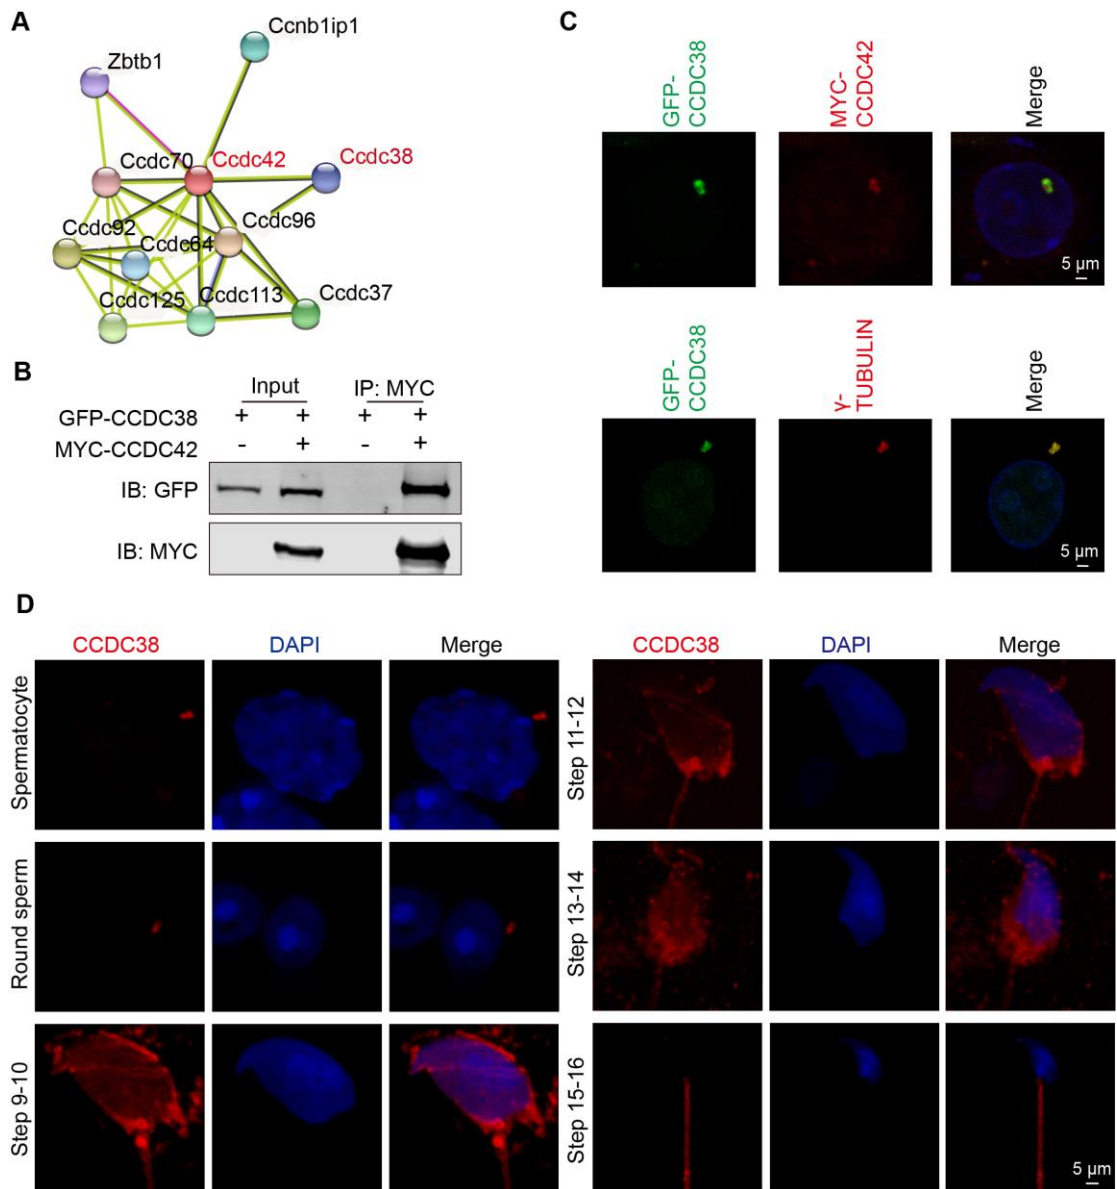

504

505 **Fig. 1. CCDC38 interacts with CCDC42.** (A) CCDC38 might be interacted with  
 506 CCDC42 predicted by the STRING database. (B) CCDC38 interacted with CCDC42.  
 507 pCSII-MYC-CCDC42 were transfected into HEK293T cells with pEGFP-C1-CCDC38,  
 508 forty-eight hours after transfection, cells were collected for immunoprecipitation with  
 509 anti-MYC, and detected by anti-GFP or anti-MYC antibodies, respectively. (C)  
 510 CCDC38 co-localized with CCDC42 and  $\gamma$ -TUBULIN in HeLa cells. pCSII-MYC-  
 511 CCDC42 and pEGFP-C1-CCDC38 were co-transfected into HeLa cells. 48 h after  
 512 transfection, cells were fixed and stained with anti-MYC and  $\gamma$ -TUBULIN antibody,  
 513 and the nucleus was stained with DAPI. (D) The immunofluorescence of CCDC38 in

514 WT mice. Testis germ cells were stained with anti-CCDC38 antibody, and nucleus was  
515 stained with DAPI.

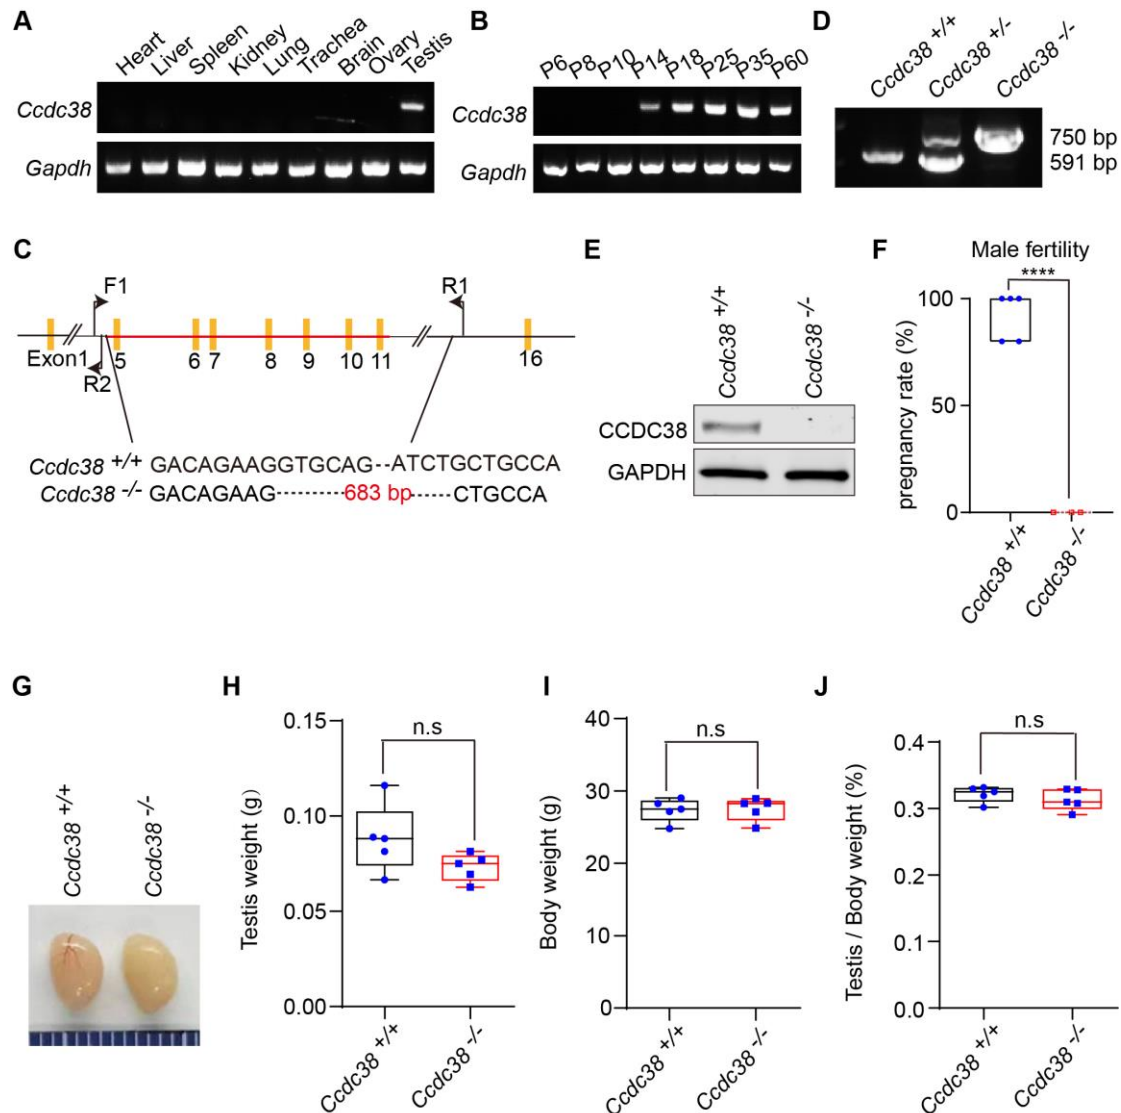

516  
517 **Fig. 2. *Ccdc38* knockout leads to male infertility.** (A) The expression of *Ccdc38* in  
518 different tissue. (B) The expression of *Ccdc38* in different days. (C) The generation of  
519 *Ccdc38*<sup>-/-</sup> mice lacking exon 5-11. (D) Genotyping of *Ccdc38*<sup>-/-</sup> mice. (E) Western  
520 blotting of CCDC38 indicated that the depletion efficiency in *Ccdc38*<sup>-/-</sup> male mice. (F)  
521 The pregnancy rate of *Ccdc38*<sup>+/+</sup> and *Ccdc38*<sup>-/-</sup> mice at 2 month, there were no  
522 pregnancy mice in *Ccdc38*<sup>-/-</sup> male mice. (G) The size of the *Ccdc38*<sup>+/+</sup> and *Ccdc38*<sup>-/-</sup>  
523 mice testes were not affected. (H) The testis weight in *Ccdc38*<sup>+/+</sup> and *Ccdc38*<sup>-/-</sup> male  
524 mice had no obvious difference (n=5). Data are presented as the mean ± SD. (I) The  
525 body weight in *Ccdc38*<sup>+/+</sup> and *Ccdc38*<sup>-/-</sup> male mice had no obvious difference (n=5).

526 Data are presented as the mean  $\pm$  SD. (J) The ratios of testis/body weight in *Ccdc38*<sup>+/+</sup>  
527 and *Ccdc38*<sup>-/-</sup> male mice were not affected (n=5). Data are presented as the mean  $\pm$  SD.

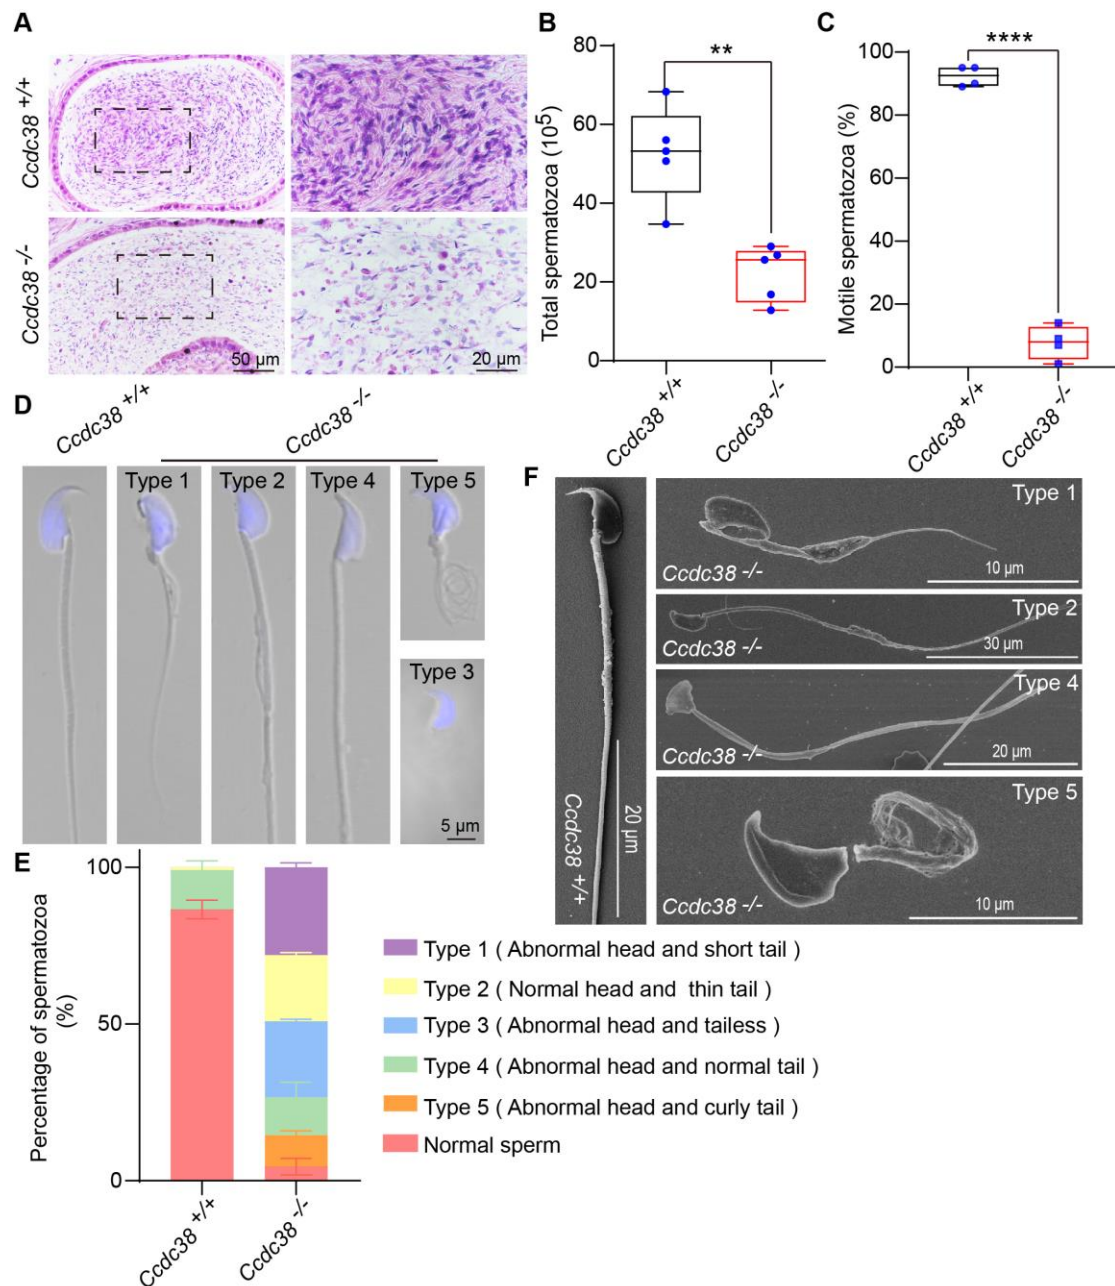

528  
529 **Fig. 3. *Ccdc38* knockout results in MMAF.** (A) H&E staining of the caudal  
530 epididymis. (B) The sperm number of *Ccdc38*<sup>+/+</sup> and *Ccdc38*<sup>-/-</sup> mice (n=5), \*\*P < 0.001.  
531 (C) The ratio of motile spermatozoa in *Ccdc38*<sup>+/+</sup> and *Ccdc38*<sup>-/-</sup> mice (n=5), \*\*\*\*P <  
532 0.0001. (D) The single-sperm immunofluorescence analysis of *Ccdc38*<sup>+/+</sup> and *Ccdc38*<sup>-/-</sup>  
533 <sup>-/-</sup> mice, nucleus was stained with DAPI. There were 5 phenotypes of the sperm: short  
534 tail, disordered tail, tailless, abnormal nuclei and curly tail. (E) The percentage of



535 different spermatozoa in *Ccdc38*<sup>+/+</sup> and *Ccdc38*<sup>-/-</sup> caudal epididymis. (F) Scanning  
536 electron microscopy analysis of sperm from epididymis of *Ccdc38*<sup>+/+</sup> and *Ccdc38*<sup>-/-</sup>  
537 mice. It's same as the immunofluorescence analysis except of tailless.

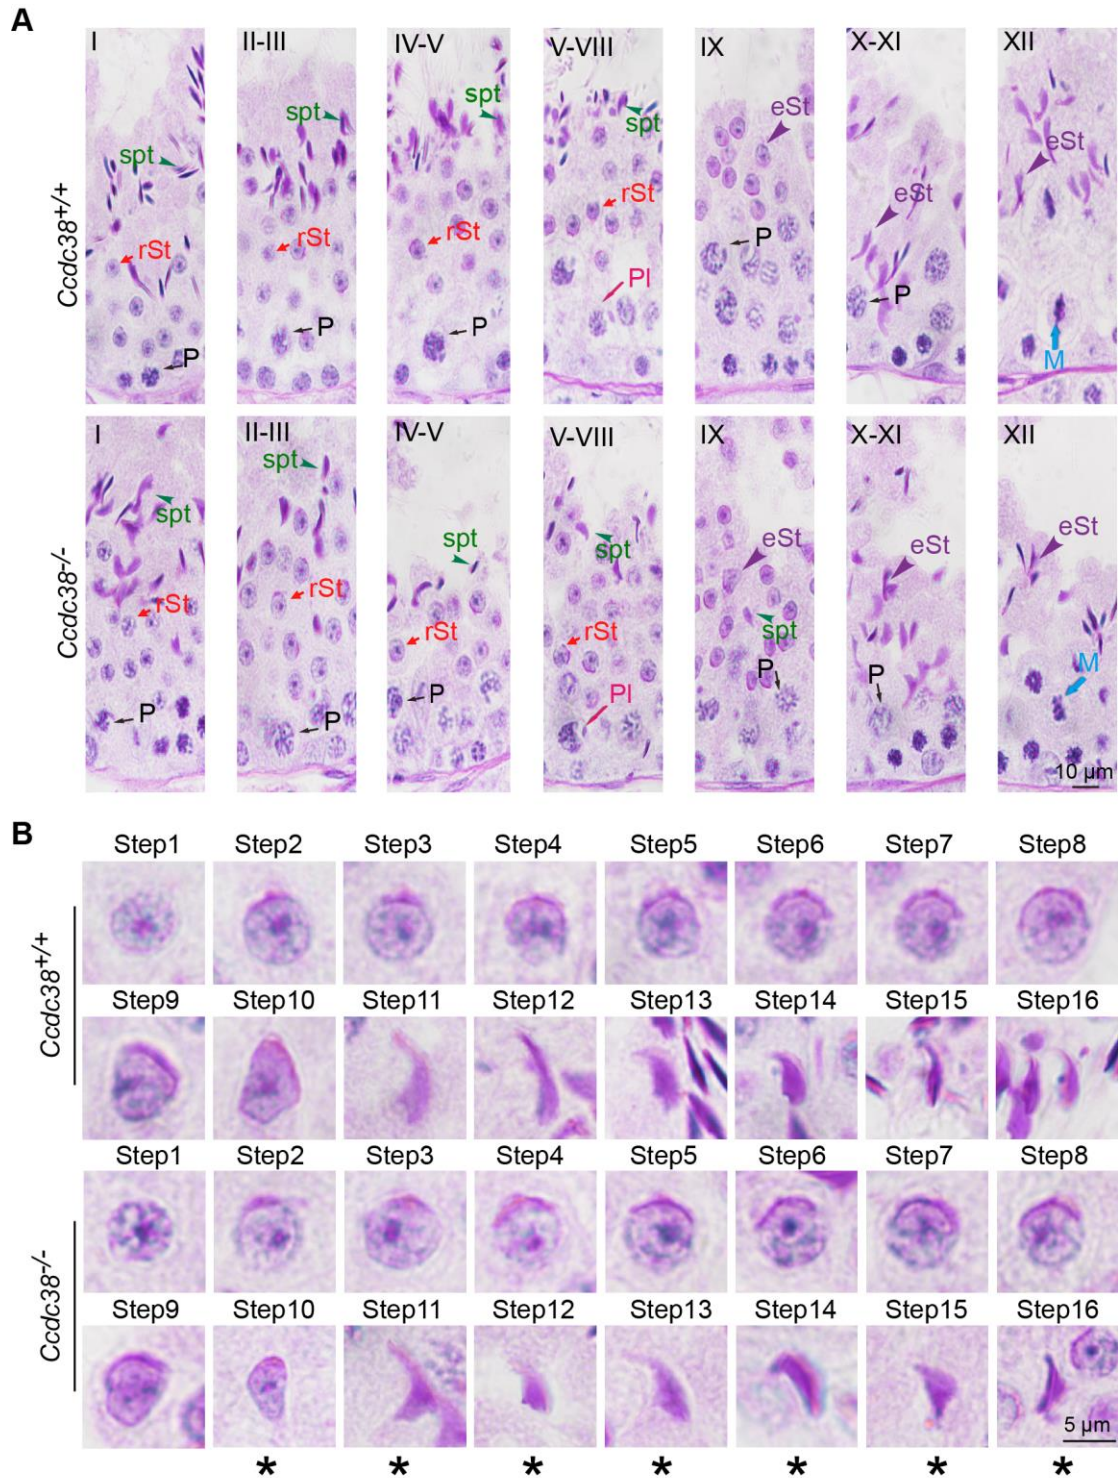

538

539 **Fig. 4. Spermiogenesis is defected in *Ccdc38*<sup>-/-</sup> mice.** (A) PAS staining of *Ccdc38*<sup>-/-</sup>  
540 testis sections showed abnormal sperm nuclear shape. P: pachytene, rst: round



541 spermatid, spt: spermatozoa, M: meiotic spermatocyte, In: spermatogonia. (B) PAS  
 542 staining of spermatid at different steps from *Ccdc38*<sup>+/+</sup> and *Ccdc38*<sup>-/-</sup> mice. Asterisks  
 543 indicated abnormal spermatid shape were found at step 10.

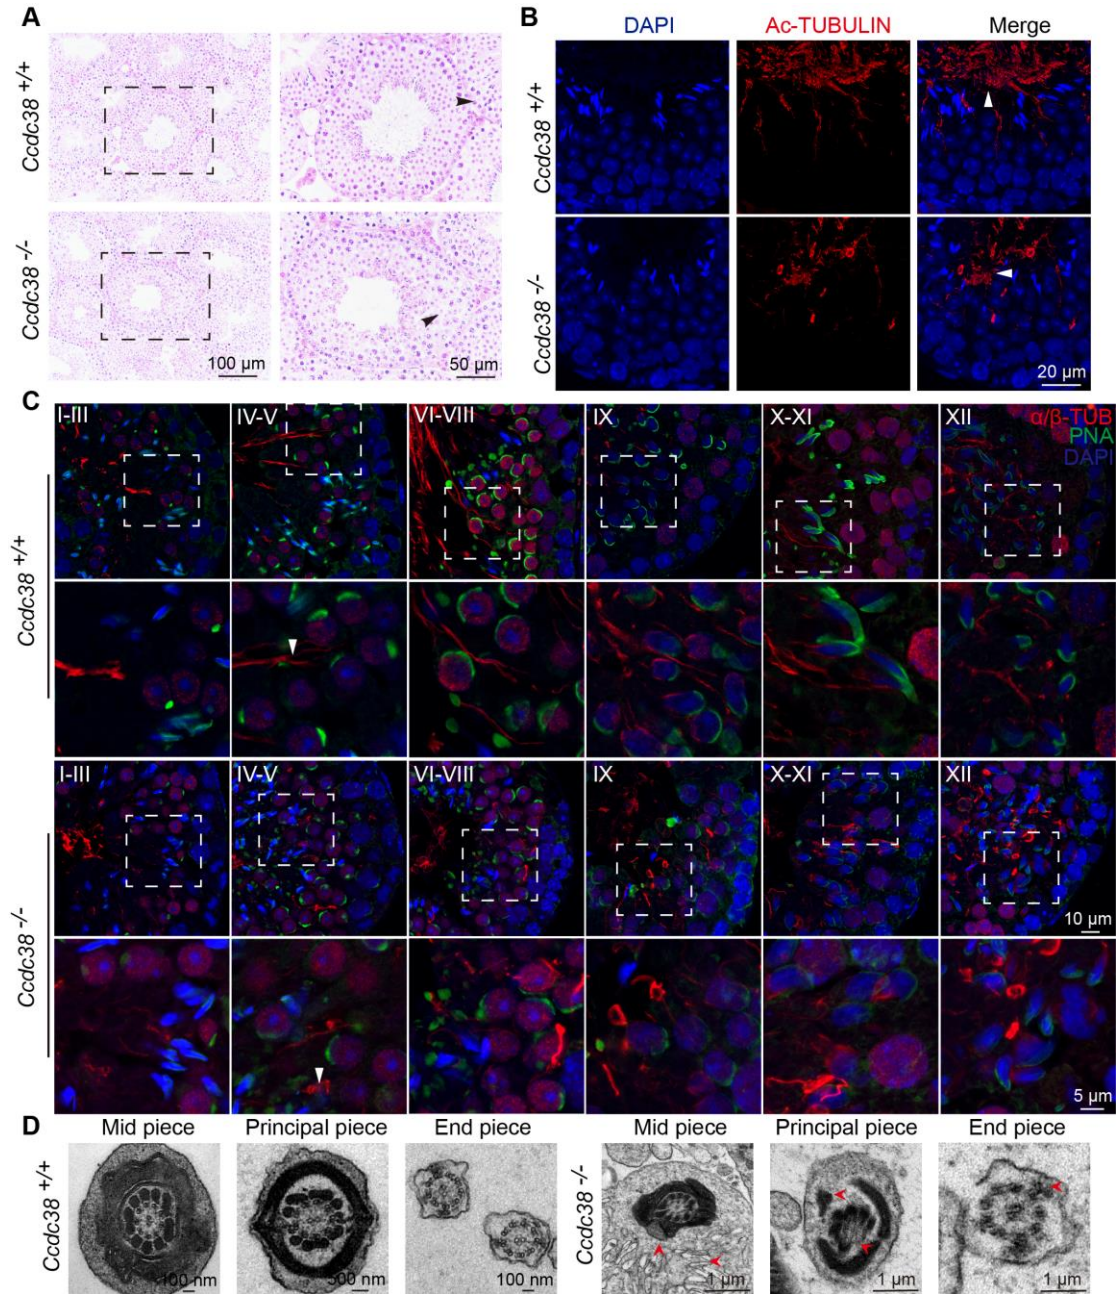

544

545 **Fig. 5. Flagellum is disorganized in *Ccdc38*<sup>-/-</sup> spermatids.** (A) The histology of the  
 546 seminiferous tubules from *Ccdc38*<sup>+/+</sup> and *Ccdc38*<sup>-/-</sup> male mice. Arrows indicated the  
 547 abnormal sperm. (B) Immunofluorescence analysis of AC-TUBULIN (red) antibodies  
 548 from *Ccdc38*<sup>-/-</sup> mice testes showed flagellar defects. Nucleus was stained with DAPI  
 549 (blue), white arrows indicated the abnormal flagellum. (C) Immunofluorescence

550 analysis of  $\alpha/\beta$ -TUBULIN (red) and PNA lectin (green) to identify sperm flagellum  
551 biogenesis. White arrows indicated the short tail at stage IV-V compare with control  
552 group. (D) Cross sections of *Ccdc38*<sup>-/-</sup> sperm tail to reveal the disorganization of  
553 axonemal microtubules and tail accessory structures (mitochondrial and fibrous sheath,  
554 outer dense fiber, red arrows indicated).

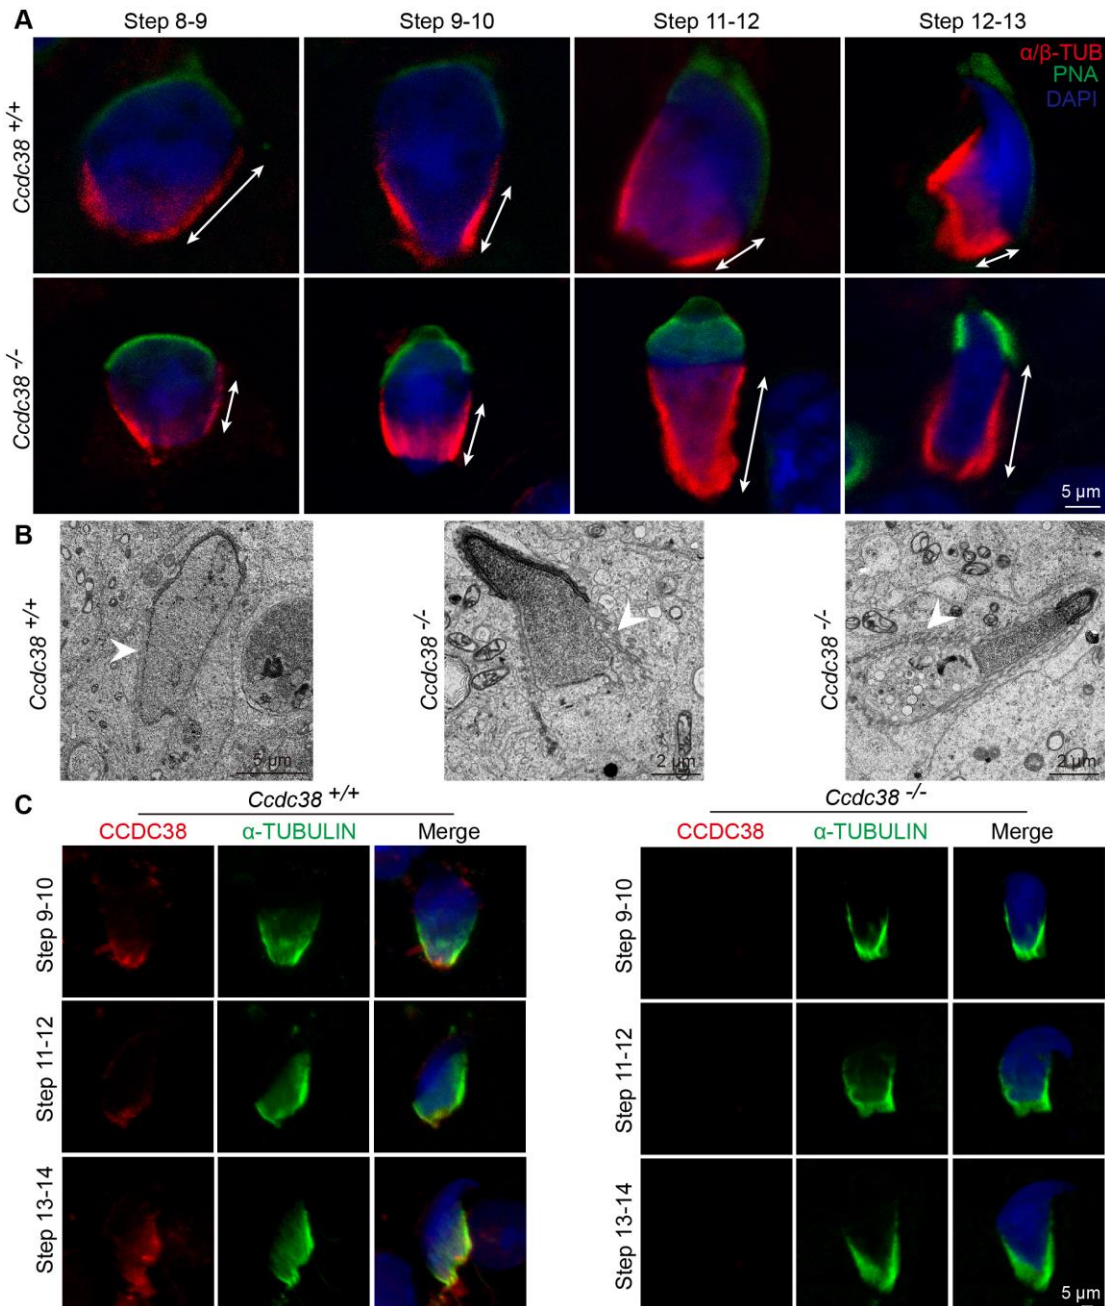

555

556 **Fig. 6. Manchette is ectopically placed in *Ccdc38*<sup>-/-</sup> spermatids.** (A) Abnormal  
557 manchette elongation in *Ccdc38*<sup>-/-</sup> spermatids. Spermatids from different manchette  
558 containing steps were stained with anti  $\alpha/\beta$ -TUBULIN antibody (red) and PNA lectin



559 (green, acrosome marker) to visualize manchette. *Ccdc38*<sup>-/-</sup> spermatids display  
 560 abnormal elongation of the manchette. (B) TEM revealed that the manchette of the  
 561 elongating spermatids (steps 9-11) of *Ccdc38*<sup>-/-</sup> mice were ectopically placed (white  
 562 arrows indicated). (C) Localization of CCDC38 in different stage germ cells. The  
 563 immunofluorescence of CCDC38 and  $\alpha$ -TUBULIN at developing germ cells.  
 564 Manchette was stained with anti- $\alpha$ -TUBULIN antibody, nucleus was stained with  
 565 DAPI.

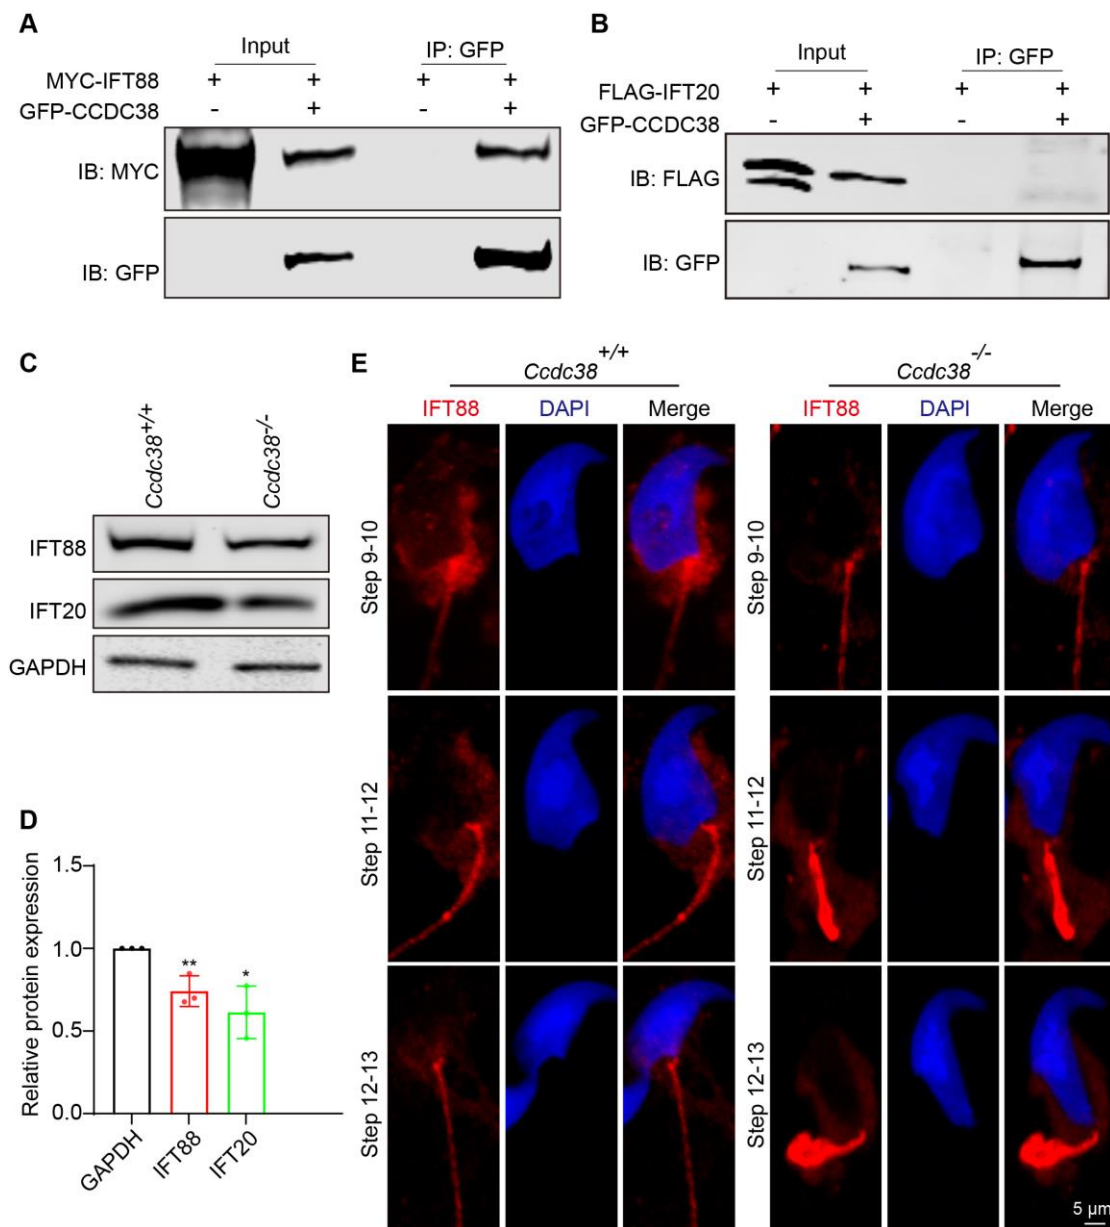

566

567 **Fig. 7. CCDC38 interacts with IFT88.** (A) CCDC38 interacts with IFT88. pCSII-  
 568 MYC-IFT88 were transfected into HEK293T cells with pEGFP-C1-CCDC38, forty-

569 eight hours after transfection, cells were collected for immunoprecipitation with anti-  
570 GFP antibody, and analyzed with anti-GFP or anti-MYC antibodies, respectively. (B)  
571 CCDC38 cannot interact with IFT20. pRK-FLAG-IFT20 were transfected into  
572 HEK293T cells with pEGFP-C1-CCDC38, forty-eight hours after transfection, cells  
573 were collected for immunoprecipitation with anti-GFP antibody, and analyzed with  
574 anti-GFP or anti-FLAG antibodies, respectively. (C) Western blotting analysis to show  
575 IFT88, IFT20 protein levels in *Ccdc38*<sup>+/+</sup> and *Ccdc38*<sup>-/-</sup> mice testis lysates. GAPDH  
576 served as a loading control. (D) The quantitative results of western blotting. \*\*P < 0.001,  
577 \*P < 0.01 indicates a significant difference (t-test). (E) Immunofluorescence of IFT88  
578 (red) and DAPI (blue) in spermatids at different stages from *Ccdc38*<sup>+/+</sup> and *Ccdc38*<sup>-/-</sup>  
579 mice.

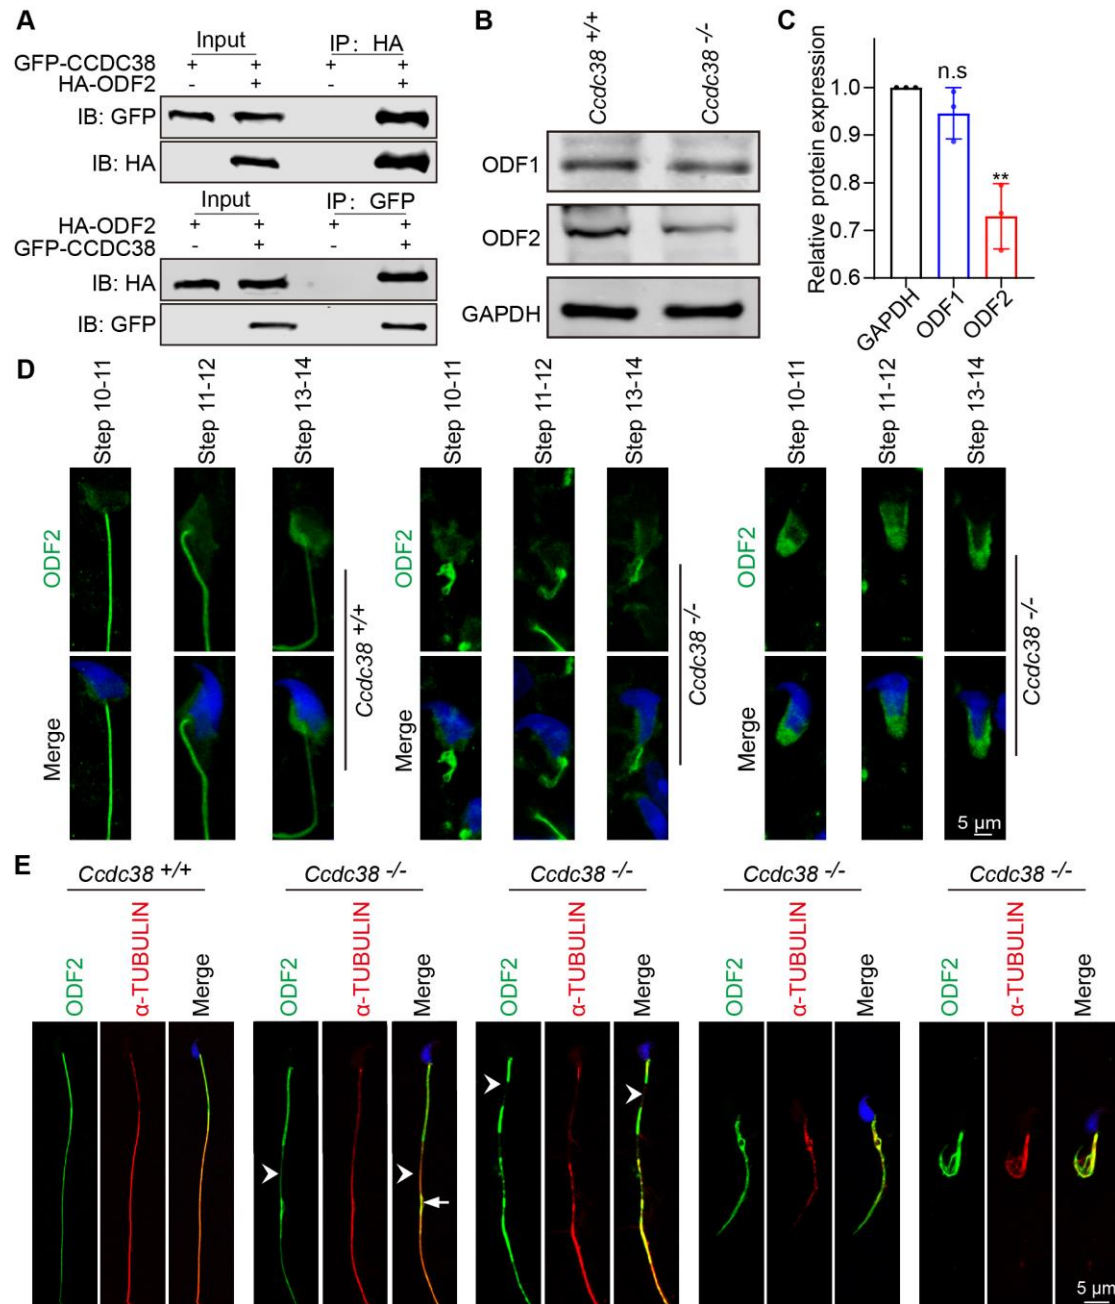

580

581 Fig 8. ODF transportation is defective in *Ccdc38* knockout spermatids. (A) CCDC38  
 582 interacted with ODF2. pCDNA-HA-ODF2 and pEGFP-C1-CCDC38 were transfected  
 583 into HEK293T cells, forty-eight hours after transfection, cells were collected for  
 584 immunoprecipitation with anti-GFP or anti-HA antibodies, and then analyzed with anti-  
 585 GFP or anti-HA antibodies, respectively. (B) Western blotting analysis to show ODF1,  
 586 ODF2 protein levels in *Ccdc38*<sup>+/+</sup> and *Ccdc38*<sup>-/-</sup> mice testis lysates. GAPDH served as  
 587 a loading control. ODF2 protein level was decreased. (C) The quantitative results of  
 588 western blot. \*\*P < 0.01 indicates a significant difference (t-test). (D) The localization

589 of ODF2 in testis germ cells. Testicular germ cells were stained with anti-ODF2  
590 antibody (green), ODF2 was localized in spermatid flagellum and manchette in *Ccdc38*<sup>-</sup>  
591 <sup>-</sup> or *Ccdc38*<sup>+/+</sup> germ cells. (E) Immunofluorescence of ODF2 (green) and  $\alpha$ -TUBULIN  
592 (red) in spermatids from *Ccdc38*<sup>+/+</sup> and *Ccdc38*<sup>-/-</sup> mice. Nucleus was stained with DAPI  
593 (blue), white arrows indicated the discontinuous, punctiform short, white arrowhead  
594 indicated the tenuous axoneme.
